# Supplementary material for: Percolative phase transition in few-layered MoSe2 field-effect transistors using Co and Cr contacts
Source: Royal Society of Chemistry journal article supplement (doi:10.1039/d4nr03986f), 2024-12-10
Supplement: d4nr03986f1.pdf [file d4nr03986f1.pdf]

## ELECTRONIC SUPPLEMENTARY INFORMATION

### Percolative phase transition in few-layered MoSe<sub>2</sub> Field-effect transistors using Co and Cr contacts

Roshan Padhan,<sup>1</sup> Carlos Garcia,<sup>2</sup> Ralu Divan,<sup>3</sup> Anirudha V. Sumant,<sup>3</sup> Daniel Rosenmann,<sup>3</sup> Sujit A. Kadam,<sup>1</sup> Akshay Wali<sup>1,3</sup>, Suzanne Miller,<sup>3</sup> Stephen A. McGill,<sup>2\*</sup> Nihar R Pradhan<sup>1\*</sup>

<sup>1</sup>Layered Materials and Device Physics Laboratory, Department of Chemistry, Physics and Atmospheric Science, Jackson State University, Jackson, MS 39217, USA.

<sup>2</sup>National High Magnetic Field Laboratory, 1800 E. Paul Dirac Dr., Tallahassee, FL 32310, USA.

<sup>3</sup>Center for Nanoscale Materials, Argonne National Laboratory, 9700 S-Cass Avenue, Lemont, IL-60439, USA

\*Email: [nihar.r.pradhan@jsums.edu](mailto:nihar.r.pradhan@jsums.edu) , [mcgill@magnet.fsu.edu](mailto:mcgill@magnet.fsu.edu)

**Figure S1: AFM Topography and Height profile for Cr-contact and Co-contact MoSe<sub>2</sub> FET devices**

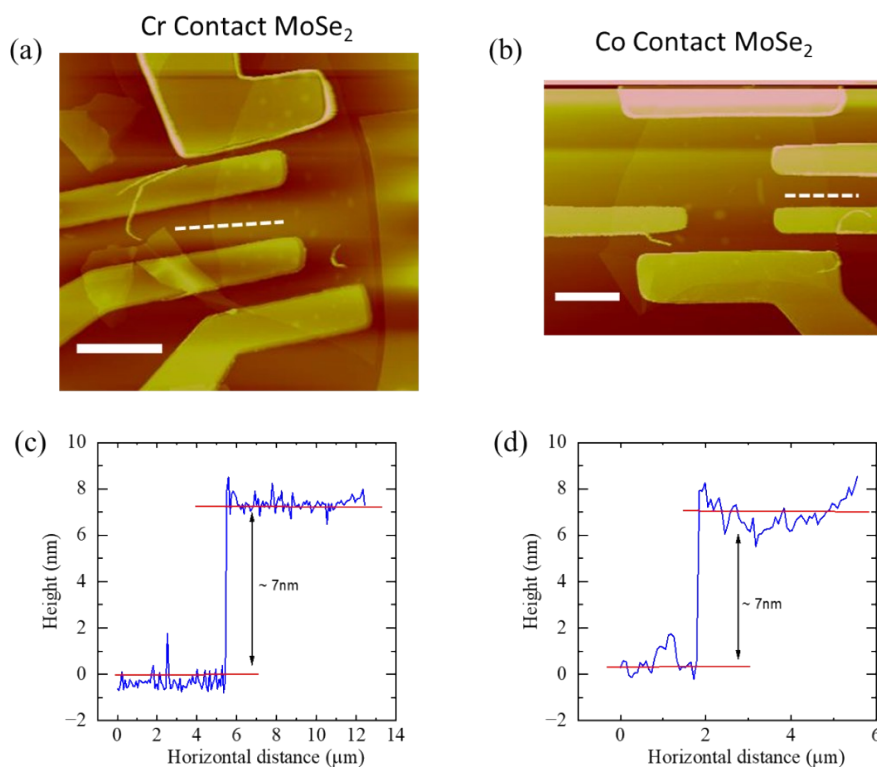

**Fig. S1 AFM mapping and height profile:** (a) & (b) Height distribution on Cr/Au contact and Co/Au contact MoSe<sub>2</sub> device (Scale bar: 5 μm), (c) & (d) Height profile at the lined spot at the corresponding images.

**Figure S2: 4-Terminal transport measurements and Contact Resistance**

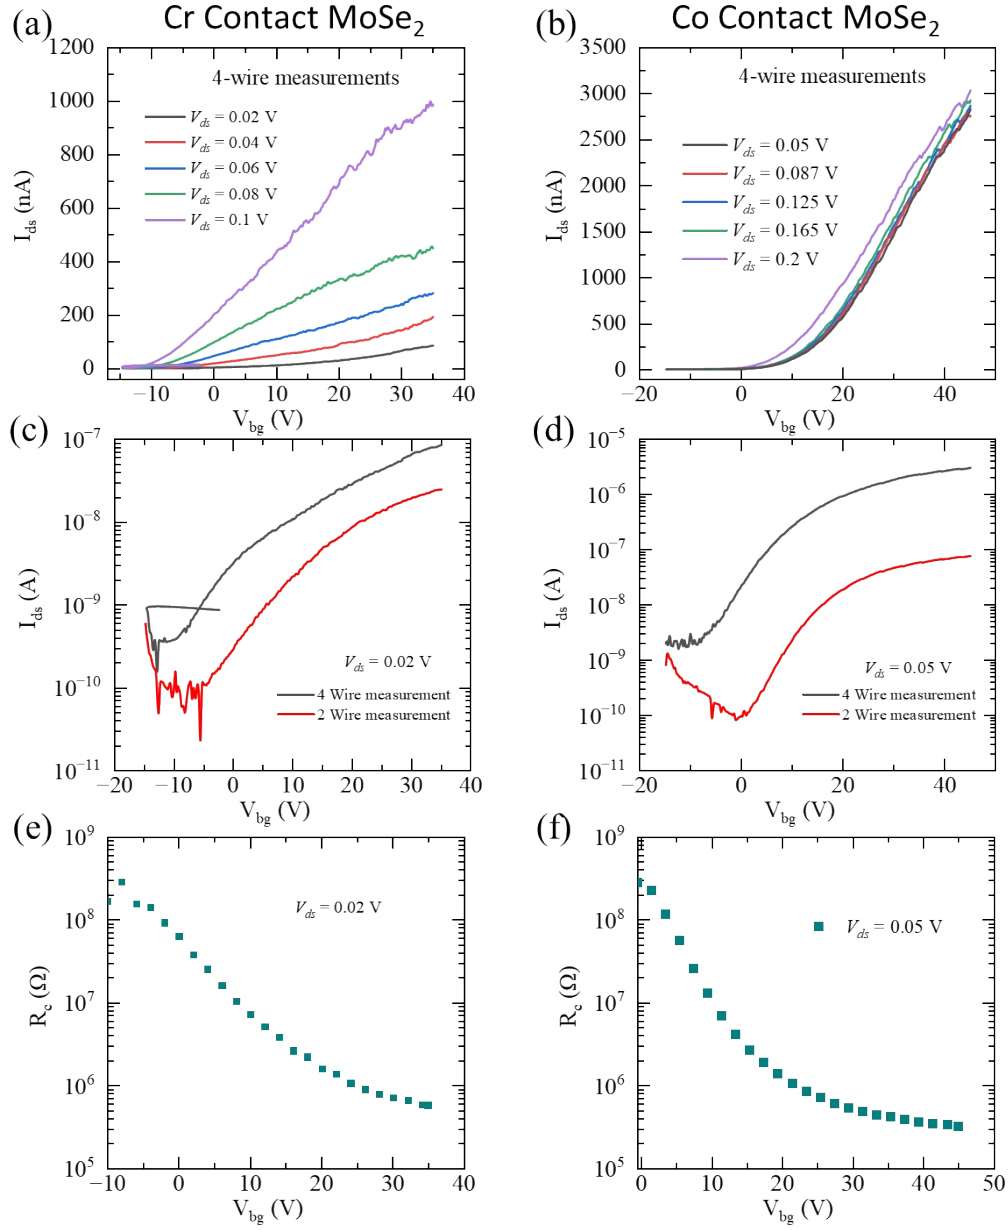

**Fig. S2 Basic FET Characterizations with 4-terminal system:** (a) & (b) Room-temperature Transfer Characteristics of MoSe<sub>2</sub> FET ( $I_{ds}$  vs  $V_{bg}$ ) at different source-drain voltages ( $V_{ds}$ ) for Cr/Au and Co/Au contact, (c) & (d) comparing 2- terminal measurement and 4- terminal measurement in the drain current ( $I_{ds}$ ) variation with back gate ( $V_{bg}$ ) voltage at fixed source-drain voltage ( $V_{ds}=0.02V$ ) for both type of devices, (e) & (f) Contact resistance extracted from the difference between 2-terminal and 4-terminal measurement as a function of back gate voltage ( $V_{bg}$ ) for both contacts.

The details 2-terminal and 4-terminal mobility of the above devices are tabulated below

| Device Type          | L ( $\mu\text{m}$ ) | $l$ ( $\mu\text{m}$ ) | W ( $\mu\text{m}$ ) | $\mu_{2T}$ ( $\text{cm}^2/\text{Vs}$ ) | $\mu_{4T}$ ( $\text{cm}^2/\text{Vs}$ ) |
|----------------------|---------------------|-----------------------|---------------------|----------------------------------------|----------------------------------------|
| Cr-MoSe <sub>2</sub> | 10.2                | 5.6                   | 8.1                 | 6.5                                    | 15.2                                   |
| Co-MoSe <sub>2</sub> | 12.9                | 5.7                   | 13.6                | 16                                     | 45.5                                   |

**Figure S3: Temperature Scaling to the Conductivity Data**

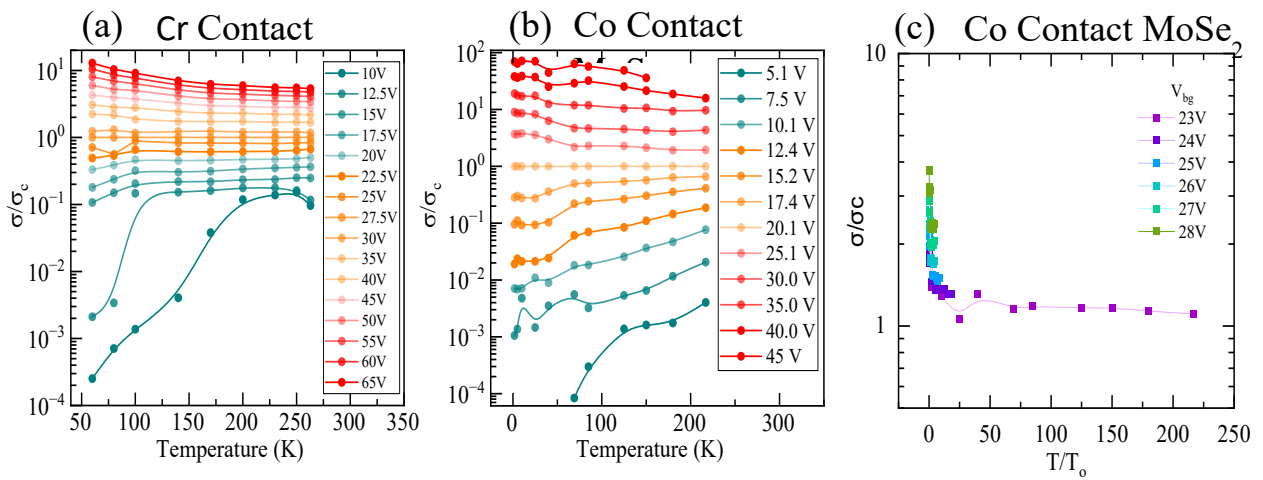

**Fig. S3 Temperature scaling with temperature parameter  $T_0$  for Co-contact:** (a and b) represents the normalized conductivities data at various applied gate voltages. The conductivity data were normalized with the critical conductivity value  $\sigma_c$  showing the metallic branch separated from the insulating branch. (c) shows the scaling of conductivity data with temperature parameter  $T_0$  to test whether the conductivities data collapse together according to quantum critical behavior but the data are not near the scaling [Reference 1,2,3] suggested no quantum critical behavior near  $T=0K$ .

**Figure S4: Percolation fitting for Cr-contact at different temperature**

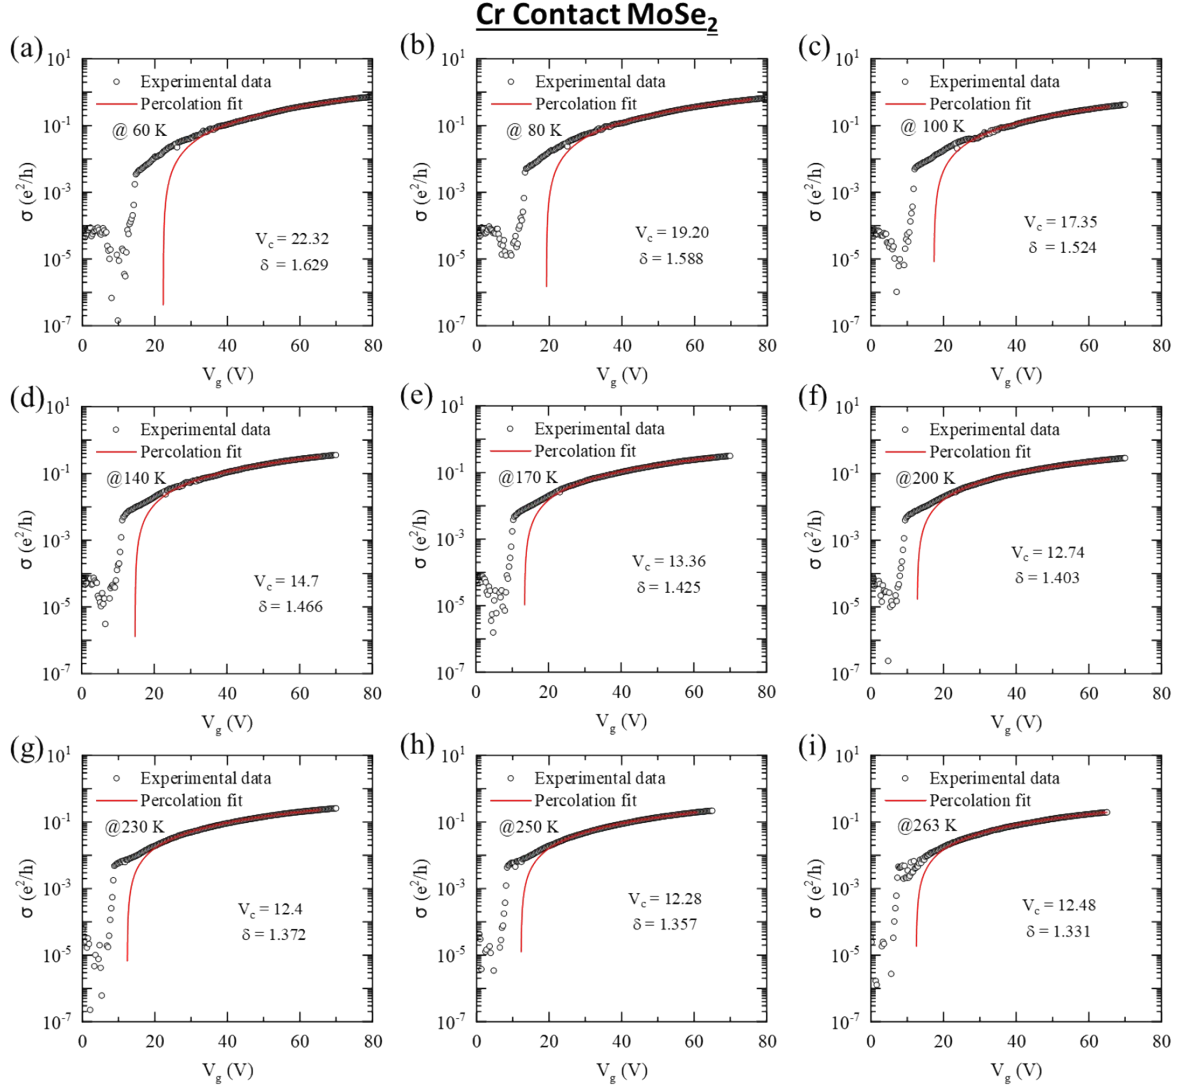

**Fig. S4 Percolation Fittings for Cr-contact:** (a-i) represents the percolation fitting on the Back gate variation of conductivity at different temperatures varying from 60K to 263K. (Extracted critical voltage ( $V_c$ ) and critical exponent( $\delta$ ) for respective temperatures is mentioned)

**Figure S5: Percolation fitting for Co-contact at different temperature**

### Co Contact MoSe<sub>2</sub>

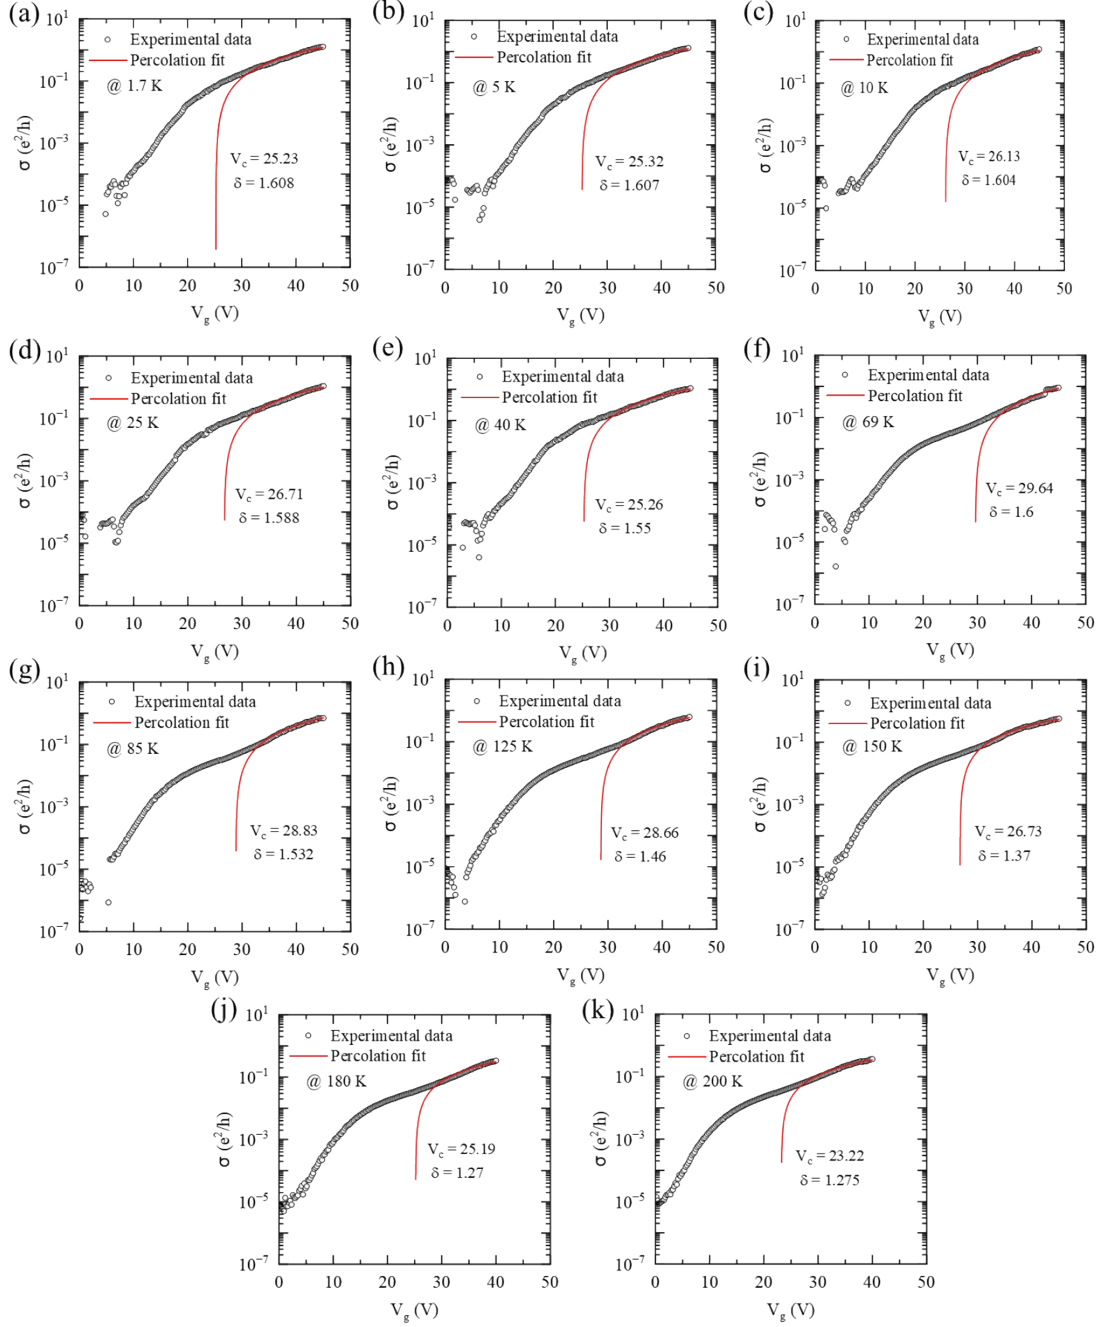

**Fig. S5 Percolation Fittings for Co-contact:** (a-k) represents the percolation fitting on the Back gate variation data of conductivity at different temperatures varying from 1.7K to 200K. (Extracted critical voltage ( $V_c$ ) and critical exponent ( $\delta$ ) for respective temperatures is mentioned)

## References

1. N.R. Pradhan, C. Garcia, B. Chakrabarti, D. Rosenmann, R. Divan, A. V. Sumant, S. Miller, D. Hilton, D. Karaiskaj, and S.A. McGill, “Insulator-to-metal phase transition in a few-layered MoSe<sub>2</sub> field effect transistor,” *Nanoscale* 15(6), 2667–2673 (2023).
2. N. R. Pradhan, A. McCreary, D. Rhodes, Z. Lu, S. Feng, E. Manousakis, D. Smirnov, R. Namburu, M. Dubey, A. R. Hight Walker, H. Terrones, M. Terrones, V. Dobrosavljevic, and L. Balicas, “Metal to Insulator Quantum-Phase Transition in Few-Layered ReS<sub>2</sub>,” *Nano Lett* 15(12), 8377–8384 (2015).
3. Lily J. Stanley, Hsun-Jen Chuang, Zhixian Zhou, Michael R. Koehler, Jiaqiang Yan, David G. Mandrus, Dragana Popović, “Low-Temperature 2D/2D Ohmic Contacts in WSe<sub>2</sub> Field-Effect Transistors as a Platform for the 2D Metal–Insulator Transition” *ACS Appl. Mater. Interfaces* 2021, 13, 8, 10594–10602
